# Supplementary material for: Upregulation of Peroxiredoxin 3 Protects Afg3l2-KO Cortical Neurons In Vitro from Oxidative Stress: A Paradigm for Neuronal Cell Survival under Neurodegenerative Conditions
Source: PubMed Central journal article supplement (PMC6875171; doi:10.1155/2019/4721950), 2019-10-31
Supplement: 4721950.f1.pdf [file 4721950.f1.pdf]

# S1

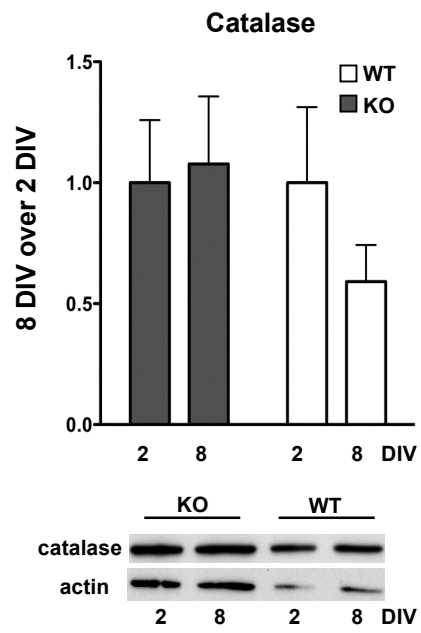

Representative western blot and quantification (neurons obtained from 5 KO and 6 WT mice) do not reveal an increase in catalase expression between 2 and 8 DIV.
